# Supplementary material for: An efficient mRNA display protocol yields potent bicyclic peptide inhibitors for FGFR3c: outperforming linear and monocyclic formats in affinity and stability
Source: Royal Society of Chemistry journal article supplement (doi:10.1039/d3sc04763f), 2024-01-01
Supplement: d3sc04763f1.xlsx [file d3sc04763f1.xlsx]

## Sheet: Sheet1
Seq														Purity cyclized/linear	observed m/z cyclized/linear	calculated MW	Response in BLI (RU)	KD in BLI cyclized (nM)	Synthesized sequence (Z= acetyl, KX = azido-L-lysine)
S	S	P	P	C	T	L	G	C	C	L	R	R	Y	36.64	1141.9	3423.64	0.0516	1.61	ZMSSPPCTLGCCLRRYGSGSGSDYKDDDDKKX
T	P	S	P	C	T	L	F	C	C	Y	R	I	Y	39.29	1178.9	3534.77	0.04	3.99	ZMTPSPCTLFCCYRIYGSGSGSDYKDDDDKKX
F	T	G	H	C	T	L	G	C	C	V	R	Y	Y	38.77	1164.23	3490.66	0.0633	2.79	ZMFTGHCTLGCCVRYYGSGSGSDYKDDDDKKX
C	K	G	V	C	P	F	S	V	C	I	A	R	L	40.44	1121.91	3363.67	0.0328	27	ZMCKGVCPFSVCIARLGSGSGSDYKDDDDKKX
C	H	F	V	C	T	F	R	Q	C	L	T	F	N	28.07	1196.28	3586.81	0	0	ZMCHFVCTFRQCLTFNGSGSGSDYKDDDDKKX
C	D	F	I	C	T	F	A	D	C	L	L	I	N	50.42	1172.16	3458.68	0.025	35.6	ZMCDFICTFADCLLINGSGSGSDYKDDDDKKX
C	H	L	V	C	T	L	A	E	C	I	S	K	S	49.64	1125.54	3374.59	0	0	ZMCHLVCTLAECISKSGSGSGSDYKDDDDKKX
P	R	W	I	C	T	F	K	Q	C	I	L	C	N	27.95	1198.31	3592.9	0.056	6.3	ZMPRWICTFKQCILCNGSGSGSDYKDDDDKKX
S	P	K	V	C	T	F	R	A	C	L	F	C	L	62.5	1152.62	3455.77	0.0396	25.4	ZMSPKVCTFRACLFCLGSGSGSDYKDDDDKKX
P	Y	V	V	C	T	L	A	G	C	I	K	C	S	51.42	1108.93	3324.57	0.0292	11.21	ZMPYVVCTLAGCIKCSGSGSGSDYKDDDDKKX
C	T	F	N	E	C	I	I	C	T	R	T	Y	F	39.44	1194.56	3581.77	0.0276	19.4	ZMCTFNECIICTRTYFGSGSGSDYKDDDDKKX
C	T	L	N	F	C	K	F	C	T	A	Y	K	Y	35.07	1191.49	3572.8	0.179	0.25	ZMCTLNFCKFCTAYKYGSGSGSDYKDDDDKKX
F	N	C	L	L	P	F	Y	S	H	T	C	S	C	29.1	1168.22	3502.69	0.11	6.4	ZMFNCLLPFYSHTCSCGSGSGSDYKDDDDKKX
F	L	C	P	M	F	P	Y	L	I	L	C	S	C	22.13	1173.19	3517.91	0.1303	29.4	ZMFLCPMFPYLILCSCGSGSGSDYKDDDDKKX
F	A	C	L	V	P	F	Y	G	L	W	C	L	C	34.12	1168.29	3502.82	0.16	13.3	ZMFACLVPFYGLWCLCGSGSGSDYKDDDDKKX
F	R	C	F	Y	G	F	S	D	L	V	C	L	C	44.76	1180.83	3540.79	0.0518	483	ZMFRCFYGFSDLVCLCGSGSGSDYKDDDDKKX
V	Y	R	C	P	Y	C	L	Y	M	C	L	L	T	38.56	1203.65	3608.95	0.35	8.5	ZMVYRCPYCLYMCLLTGSGSGSDYKDDDDKKX
M	Y	R	C	P	W	C	Y	Q	T	C	F	F	R	36.78	943.71	3772.06	0.023	2140	ZMMYRCPWCYQTCFFRGSGSGSDYKDDDDKKX
M	Y	R	C	P	F	C	D	H	T	C	F	I	S	32.48	1197.57	3590.83	0	0	ZMMYRCPFCDHTCFISGSGSGSDYKDDDDKKX
A	C	P	I	G	C	T	N	T	L	R	Y	C	Y	34.5	1149.23	3445.62	0.031	18.5	ZMACPIGCTNTLRYCYGSGSGSDYKDDDDKKX
S	C	K	I	G	Q	T	C	P	F	S	Y	C	F	49.85	1151.3	3451.64	0.0172	82.2	ZMSCKIGQTCPFSYCFGSGSGSDYKDDDDKKX
F	C	H	I	G	C	T	A	F	L	S	R	C	W	36.88	1171.24	3511.75	0.025	264	ZMFCHIGCTAFLSRCWGSGSGSDYKDDDDKKX
T	L	K	E	H	I	W	W	L	W	E	T	Y	Y	41.99	1241.35	3722.98	0.0557		ZMTLKEHIWWLWETYYGSGSGSDYKDDDDKKX
T	L	A	E	L	K	R	W	L	W	E	E	F	V	59.33	1192.07	3574.88	0.036	10.23	ZMTLAELKRWLWEEFVGSGSGSDYKDDDDKKX
T	L	R	H	L	I	L	K	L	W	R	K	Y	Y	27.38	1006.91	3658.11	0.0578	242	ZMTLRHLILKLWRKYYGSGSGSDYKDDDDKKX
T	L	A	E	A	I	I	R	F	K	H	R	V	F	28.97	1022.32	3455.83	0.0312		ZMTLAEAIIRFKHRVFGSGSGSDYKDDDDKKX
T	L	K	E	L	I	Q	I	T	Y	K	F	H	F	21.96	1179.15	3535.89	0.0232	211.1	ZMTLKELIQITYKFHFGSGSGSDYKDDDDKKX
K	P	P	Y	Y	F	V	Y	T	F	Q	Q	L	K	56.35	1192.81	3576.9	0.0259	860.6	ZMKPPYYFVYTFQQLKGSGSGSDYKDDDDKKX
K	D	P	F	T	Y	V	Y	T	F	R	Q	L	K	40.35	1187.43	3560.86	0.0463	659	ZMKDPFTYVYTFRQLKGSGSGSDYKDDDDKKX
Y	D	L	P	F	R	V	I	Y	T	L	A	Q	I	48.88	1156.17	3466.8	0.0504	0.001	ZMYDLPFRVIYTLAQIGSGSGSDYKDDDDKKX
Y	D	L	P	F	R	V	I	Y	T	L	A	Q	I	46.91	1156.19	3466.8	0.0393	400.8	ZMYDLPFRVIYTLAQIGSGSGSDYKDDDDKKX
D	I	P	Y	W	I	I	Y	T	L	Q	Q	L	K	51.17	1183.51	3548.89	0.0609	251.6	ZMDIPYWIIYTLQQLKGSGSGSDYKDDDDKKX
D	S	K	Y	V	T	L	Y	Y	Q	L	W	W	K	36.89	1216.45	3647.92	0.2038	138.2	ZMDSKYVTLYYQLWWKGSGSGSDYKDDDDKKX
D	F	I	K	I	F	T	L	L	Q	I	Q	K	Q	42.08	1163.92	3489.88	0.0132		ZMDFIKIFTLLQIQKQGSGSGSDYKDDDDKKX
D	Y	T	Y	I	Y	T	L	E	Q	I	G	S	R	30.18	1159.48	3476.64	0.0079		ZMDYTYIYTLEQIGSRGSGSGSDYKDDDDKKX
P	F	S	Y	V	W	T	L	Y	Q	W	T	E	Q	63.03	1201.45	3453.66	0.0016		ZMPFSYVWTLYQWTEQGSGSGSDYKDDDDKKX
P	W	T	F	V	Y	S	I	G	E	L	S	H	Y	40.43	1151.84	3466.8	0.0024	0.001	ZMPWTFVYSIGELSHYGSGSGSDYKDDDDKKX
W	D	T	W	Y	H	K	W	T	F	A	G	W	Y	26.8	1234.48	3701.89	-0.0061		ZMWDTWYHKWTFAGWYGSGSGSDYKDDDDKKX
W	D	T	W	Y	H	K	W	T	F	A	G	W	Y	26.66	1234.49	3701.89	0.0011	50160	ZMWDTWYHKWTFAGWYGSGSGSDYKDDDDKKX
Y	W	W	E	F	D	D	T	P	G	F	I	K	V	43.43	1186.45	3557.77	0.0196	15.12	ZMYWWEFDDTPGFIKVGSGSGSDYKDDDDKKX
Y	W	W	E	F	D	D	T	P	G	F	I	K	V	41.11	1186.42	3557.77	0.0111	0.001	ZMYWWEFDDTPGFIKVGSGSGSDYKDDDDKKX
F	D	Y	W	V	H	Y	P	F	W	V	V	H	K	40.34	1226.5	3677.97	0.0199	1029	ZMFDYWVHYPFWVVHKGSGSGSDYKDDDDKKX
F	D	Y	W	V	H	Y	P	F	W	V	V	H	K	39.04	1226.51	3677.97	0.0175	1763	ZMFDYWVHYPFWVVHKGSGSGSDYKDDDDKKX
T	R	P	V	C	T	L	L	I	C	M	S	R	Y	12.31	1171.37	3512.94	0.0474	3.85	ZMTRPVCTLLICMSRYGSGSGSDYKDDDDKKX
F	N	Y	I	C	T	L	M	D	C	S	S	F	Y	32.38	1188.37	3563.85	0.0311	11.8	ZMFNYICTLMDCSSFYGSGSGSDYKDDDDKKX
F	S	Y	V	C	T	L	K	S	C	I	A	M	H	16.34	1153.76	3459.83	0.047	4.993	ZMFSYVCTLKSCIAMHGSGSGSDYKDDDDKKX
Y	R	Y	I	C	T	L	S	N	C	L	A	S	Y	45.15	1176.07	3526.8	0.0534	10.79	ZMYRYICTLSNCLASYGSGSGSDYKDDDDKKX
F	R	Q	V	C	T	L	S	Q	C	I	N	L	F	34.82	1176.72	3528.88	0.0305	112.2	ZMFRQVCTLSQCINLFGSGSGSDYKDDDDKKX
T	I	C	T	L	R	Q	V	I	T	N	C	Y	H	36.78	1174.46	3521.82	0.0349	22.87	ZMTICTLRQVITNCYHGSGSGSDYKDDDDKKX
Q	T	C	T	F	K	E	H	L	V	L	C	G	Y	26.07	1166.74	3498.78	0.0941	53.65	ZMQTCTFKEHLVLCGYGSGSGSDYKDDDDKKX
T	K	F	C	V	Y	P	D	L	I	C	Y	I	S	39.84	1174.47	3521.87	0.0144	123.2	ZMTKFCVYPDLICYISGSGSGSDYKDDDDKKX
T	K	F	C	V	Y	P	D	L	I	C	Y	I	S	37.31	1174.48	3521.87	0.0102	290.7	ZMTKFCVYPDLICYISGSGSGSDYKDDDDKKX
K	F	Y	C	D	A	L	L	N	F	C	F	V	S	32.27	1176.06	3526.86	-0.0068		ZMKFYCDALLNFCFVSGSGSGSDYKDDDDKKX
S	R	F	C	V	W	S	R	D	Y	C	Y	Y	L	30.55	1239.78	3718	0.0228	490.5	ZMSRFCVWSRDYCYYLGSGSGSDYKDDDDKKX
T	F	L	D	T	C	T	R	C	Y	V	S	F	M	16.58	1181.85	3543.86	0.0869	59.92	ZMTFLDTCTRCYVSFMGSGSGSDYKDDDDKKX
T	F	R	E	M	C	A	K	C	Y	L	M	M	V	18.8	1199.94	3583.07	0.1006	43.33	ZMTFREMCAKCYLMMVGSGSGSDYKDDDDKKX
I	S	T	V	M	C	Q	A	C	L	M	Y	L	H	26.12	1157.16	3469.89	0.1806	8.47	ZMISTVMCQACLMYLHGSGSGSDYKDDDDKKX
F	T	Y	I	C	P	F	S	F	C	L	S	M	V	21.76	1172.06	3514.92	0.0063	61.86	ZMFTYICPFSFCLSMVGSGSGSDYKDDDDKKX
F	T	F	I	C	P	L	A	R	C	L	L	I	R	30.6	1174.85	3523.02	0.0079	3132	ZMFTFICPLARCLLIRGSGSGSDYKDDDDKKX
N	P	G	N	C	Y	F	G	W	C	V	M	T	L	30.07	1154.47	3461.75	0.0138	3.685	ZMNPGNCYFGWCVMTLGSGSGSDYKDDDDKKX
N	P	G	N	C	Y	F	G	W	C	V	M	T	L	30.03	1154.46	3461.75	0.0017	133.8	ZMNPGNCYFGWCVMTLGSGSGSDYKDDDDKKX
